# Supplementary material
Source: publisher site journal article supplement (https://www.spandidos-publications.com/5206/downloadSupplementary)

Figure S1. Expression and Kaplan Mayer survival plots for the genes *FUNDC1*, *FATE1*, *TRPM8*, *MTOR*, *EIF2AK3*, *CAPN1*, *HK2*, *TMBIM6*, *BCL2L11*, *SIGMAR1*, *PTEN* and *PACS2* in different cancer patients. Data were extracted from <http://ualcan.path.uab.edu/>. LUAD, lung adenocarcinoma; OV, ovarian cancer; BRCA, breast cancer; SKCM, skin cutaneous melanoma; LIHC, liver hepatocellular carcinoma; LAML, acute myeloid leukemia; ACC, adenoid cystic carcinoma.

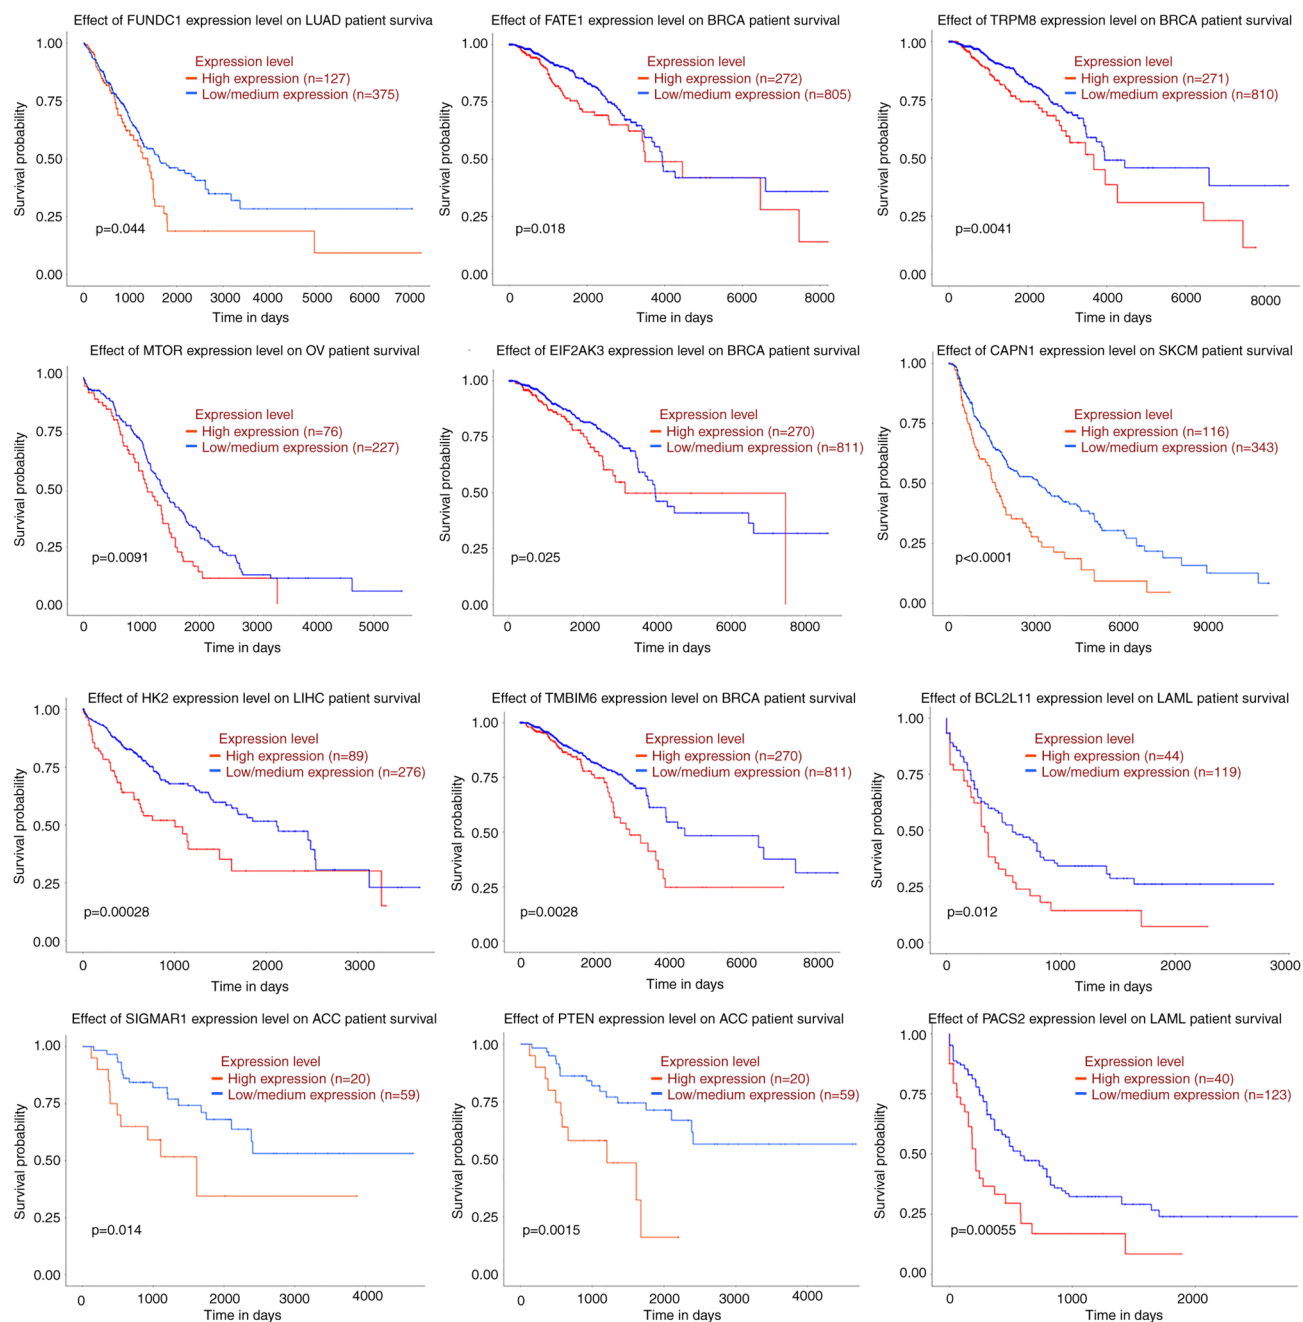

Supplement: Supplementary file 1 [file downloadSupplementary]
